# Supplementary material
Source: PubMed Central journal article supplement (PMC1863453)
Supplement: pnas_0611076104_1.pdf [file pnas_0611076104_1.pdf]

**ALB, number of cancerous ESTs**

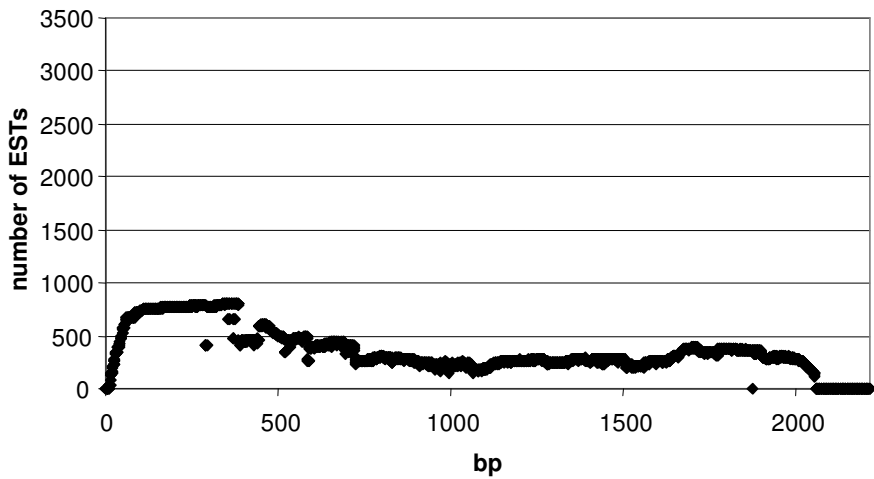

**ALB, number of normal ESTs**

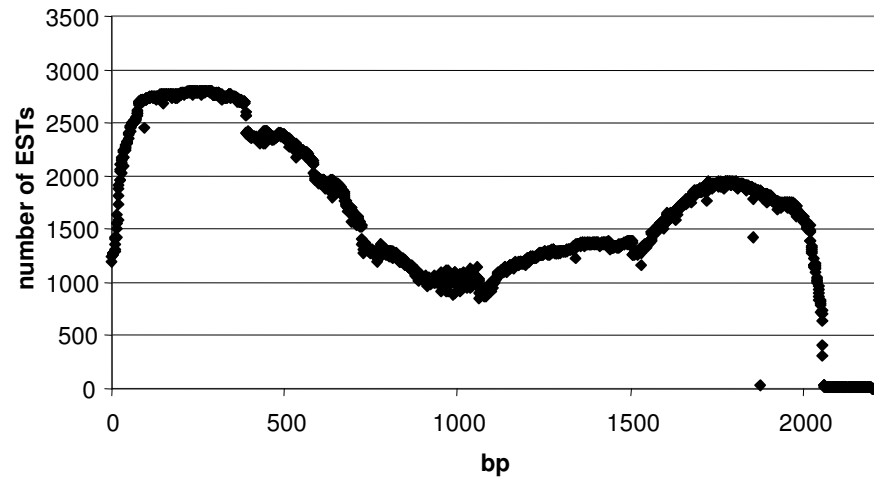

**ALB, deviation related to RefSeq, cancerous ESTs**

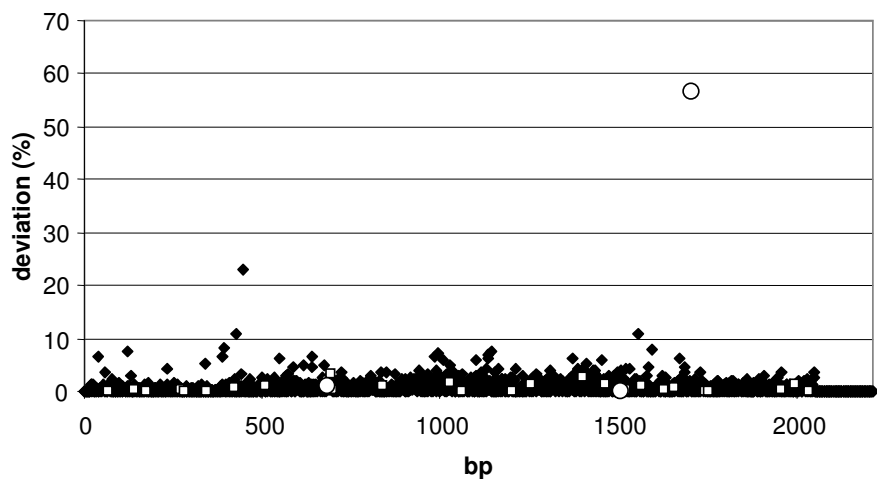

**ALB, deviation related to RefSeq, normal ESTs**

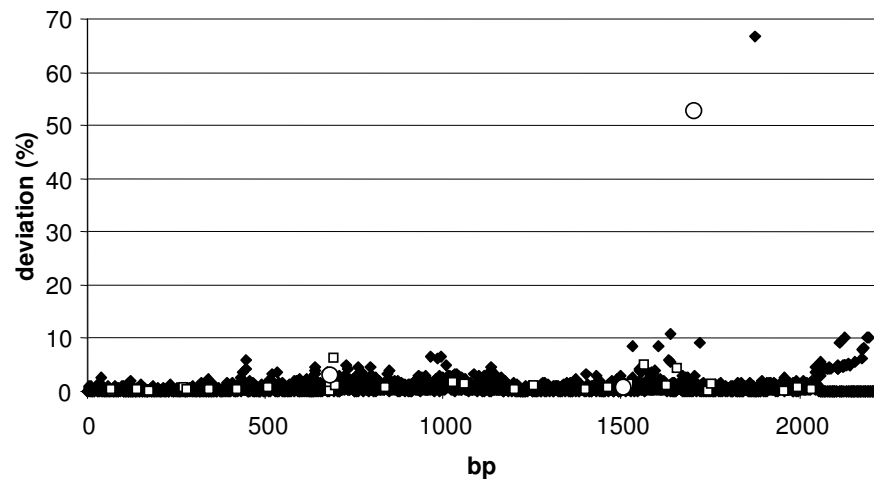

Albumin

**ALDOA, number of cancerous ESTs**

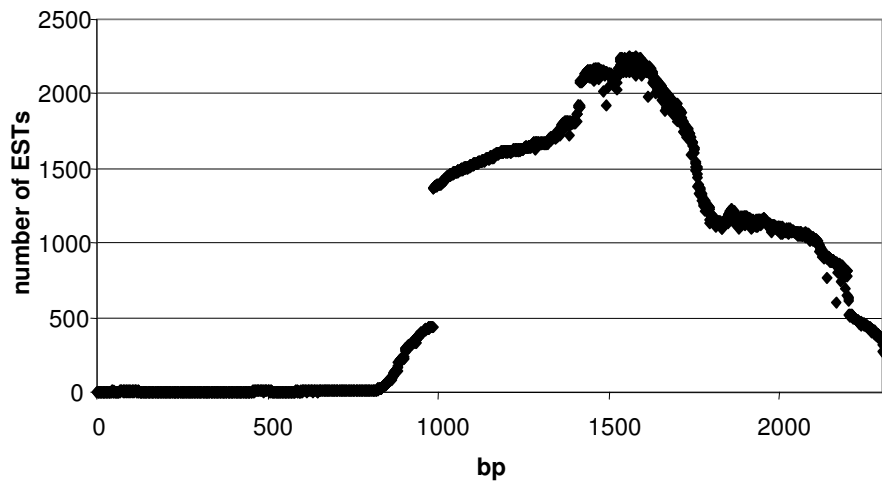

**ALDOA, number of normal ESTs**

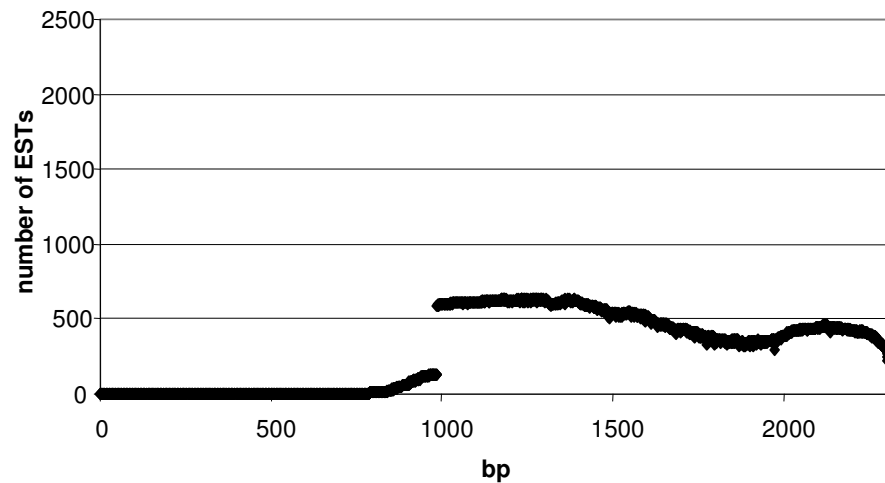

**ALDOA, deviation related to RefSeq, cancerous ESTs**

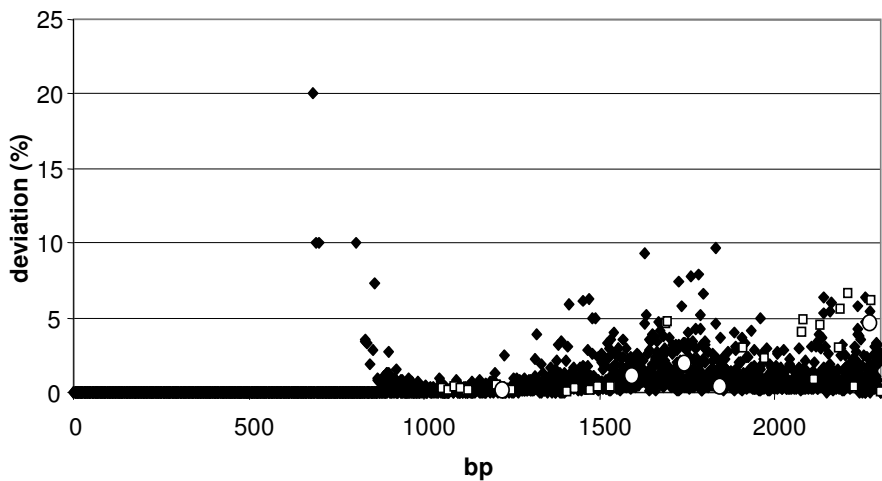

**ALDOA, deviation related to RefSeq, normal ESTs**

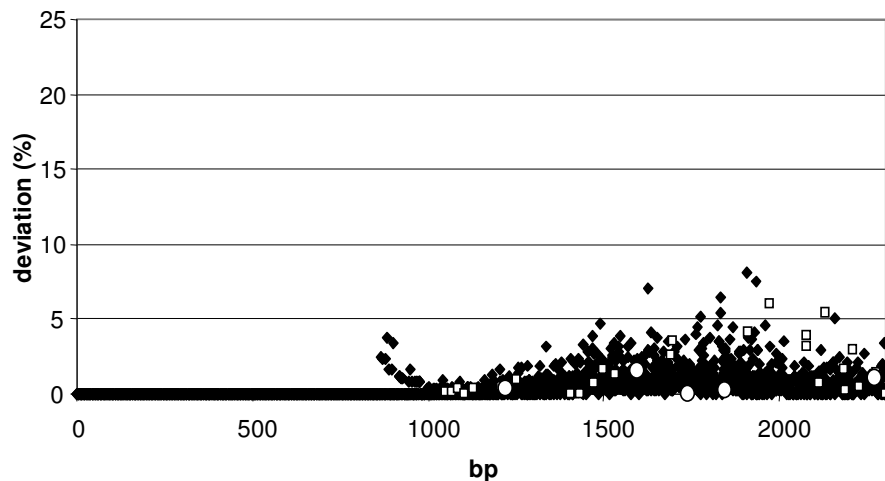

Aldolase A, fructose-bisphosphate

**ATP5A1, number of cancerous ESTs**

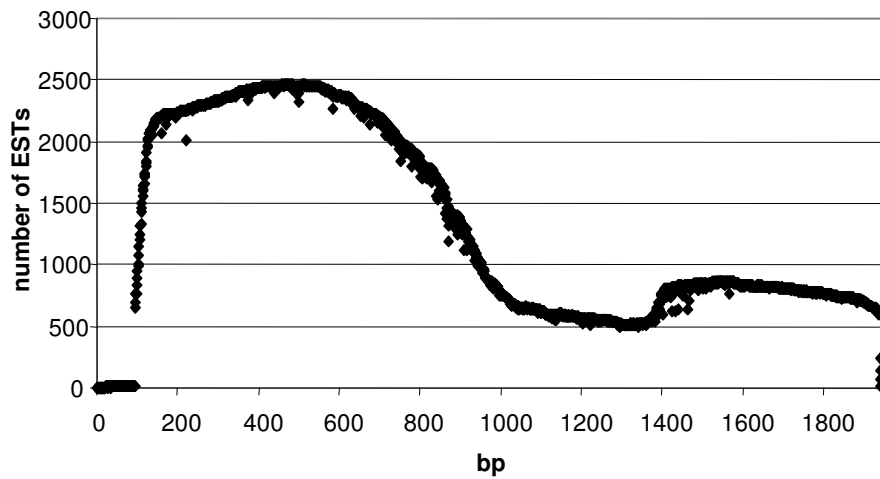

**ATP5A1, number of normal ESTs**

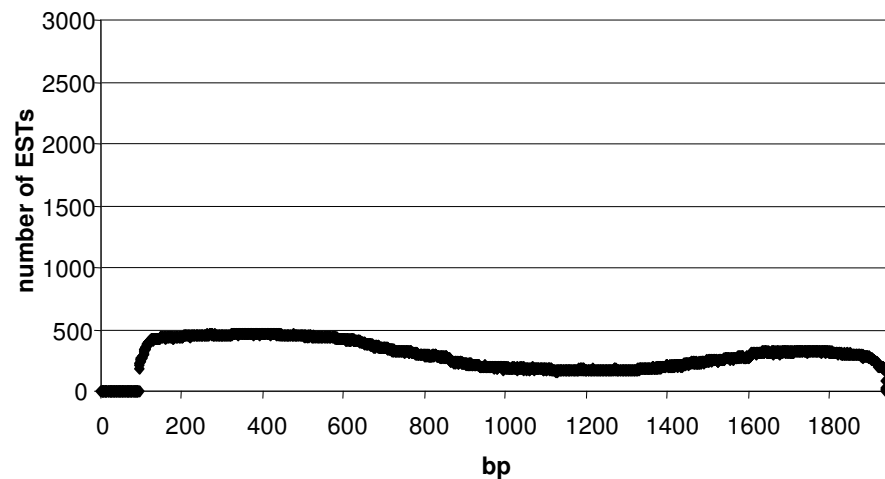

**ATP5A1, deviation related to RefSeq, cancerous ESTs**

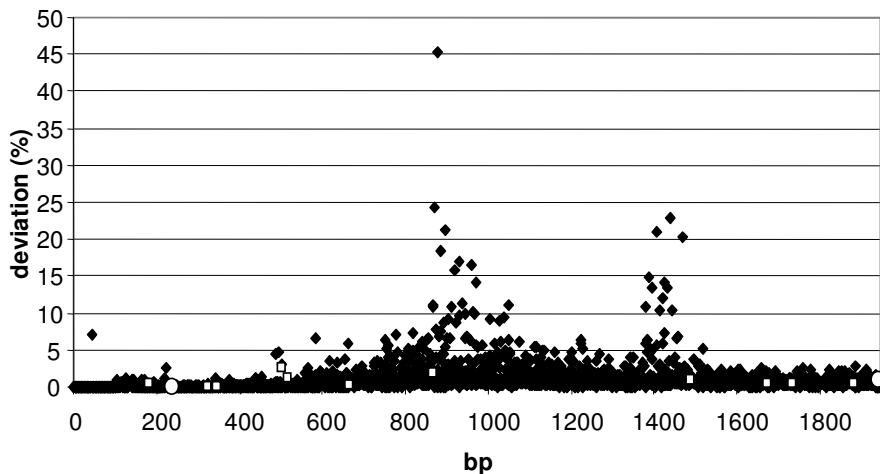

**ATP5A1, deviation related to RefSeq, cancerous ESTs**

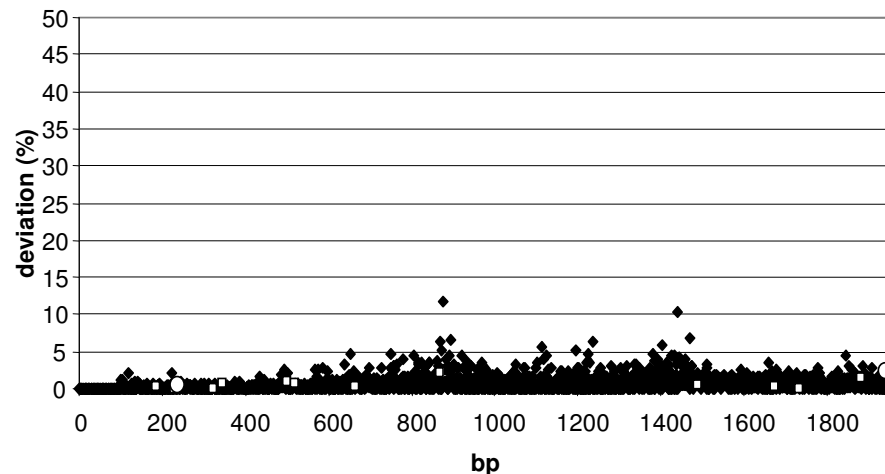

ATP synthase, H<sup>+</sup> transporting, mitochondrial F1 complex, alpha subunit 1, cardiac muscle

**CALM2, number of cancerous ESTs**

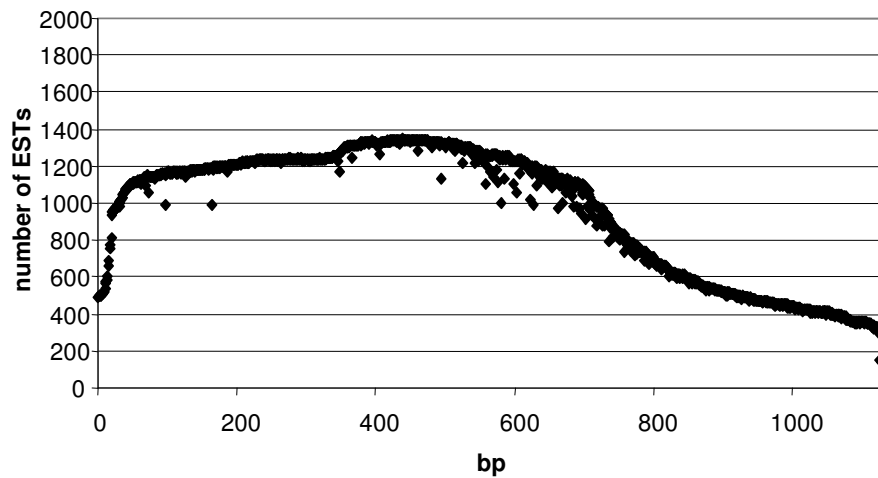

**CALM2, number of normal ESTs**

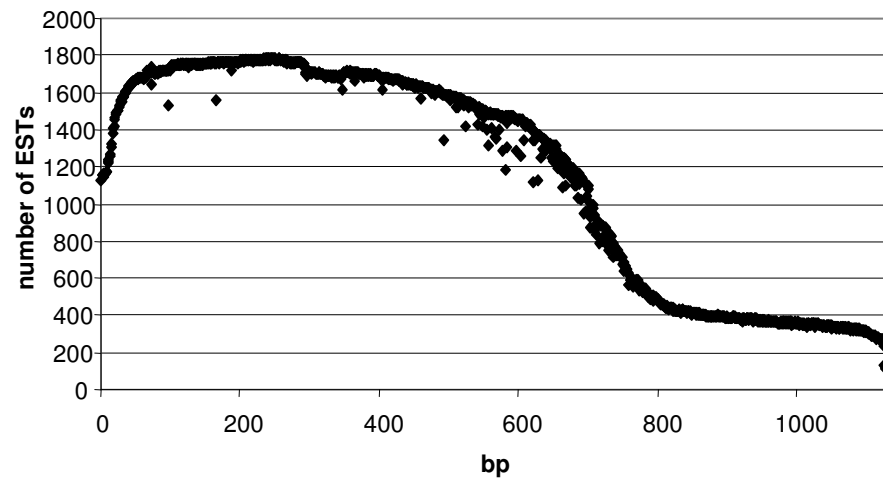

**CALM2, deviation related to RefSeq, cancerous ESTs**

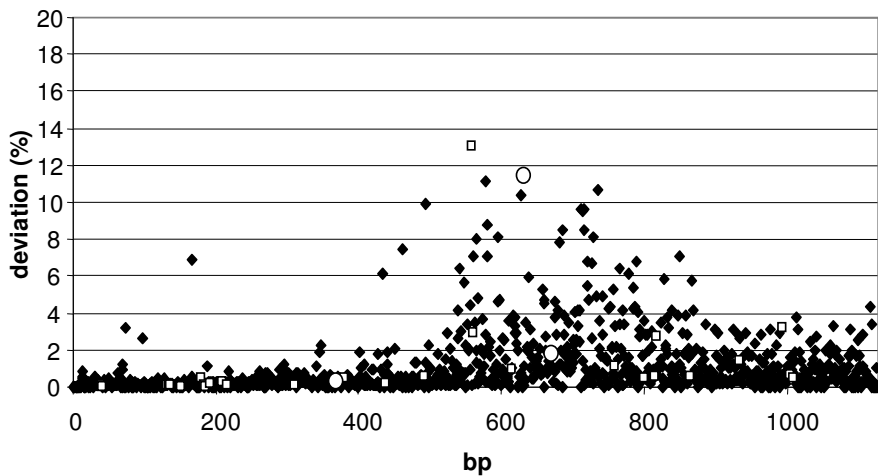

**CALM2, deviation related to RefSeq, normal ESTs**

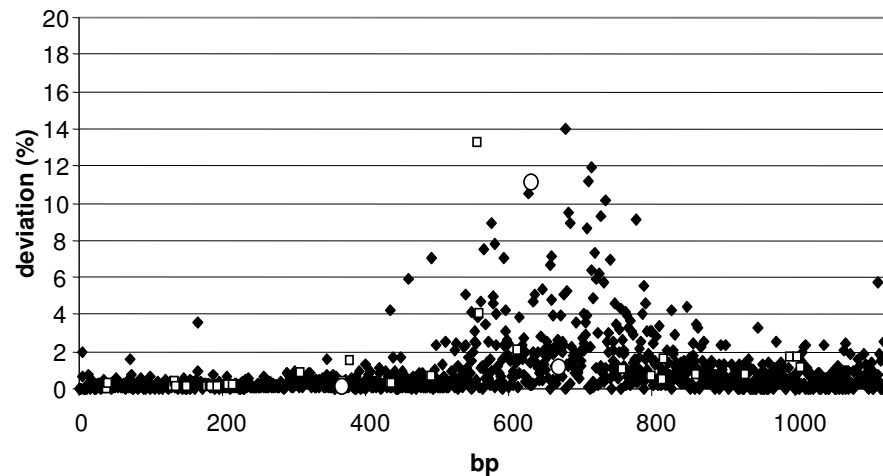

Calmodulin 2 (phosphorylase kinase, delta)

ENO1, number of cancerous ESTs

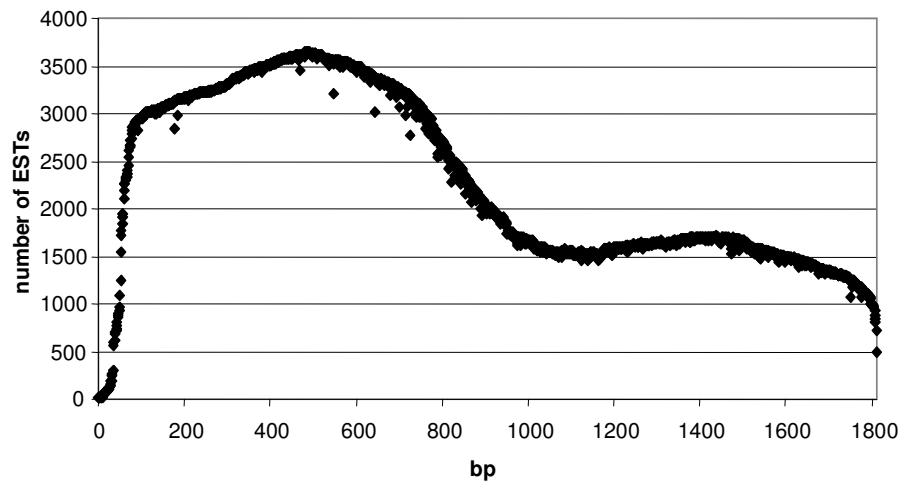

ENO1, number of normal ESTs

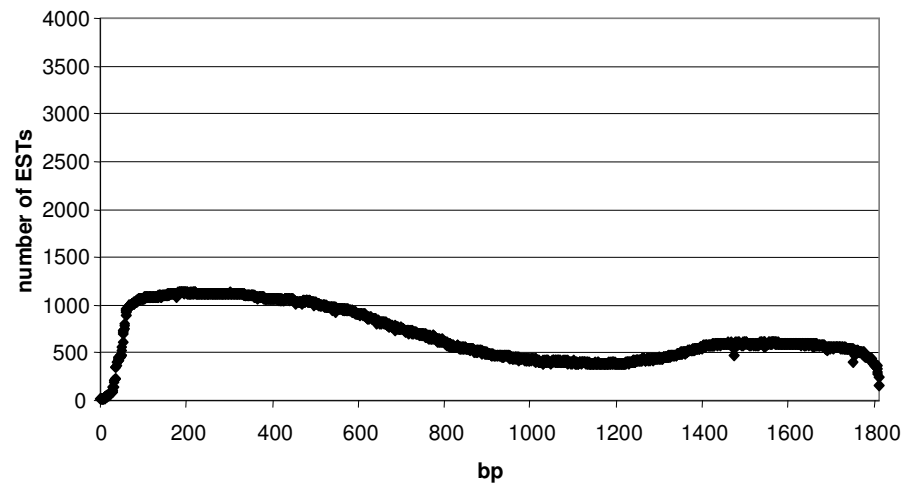

ENO1, deviation related to RefSeq, cancerous ESTs

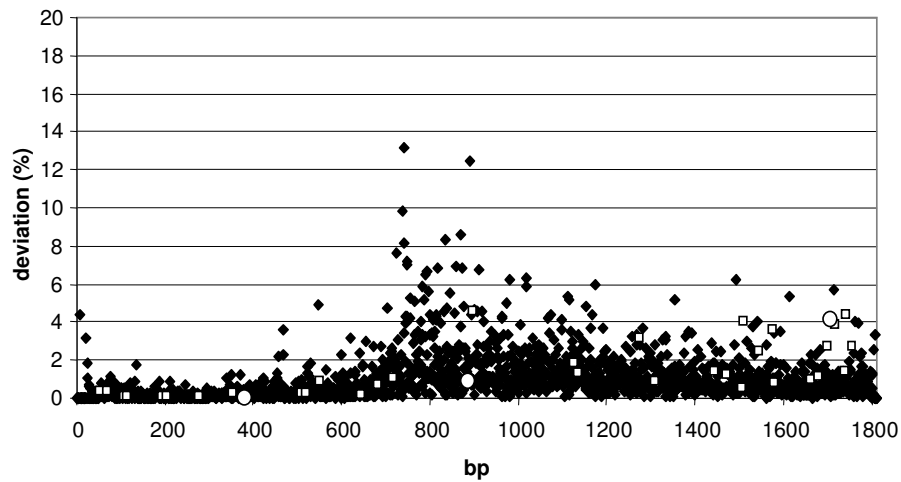

ENO1, deviation related to RefSeq, normal ESTs

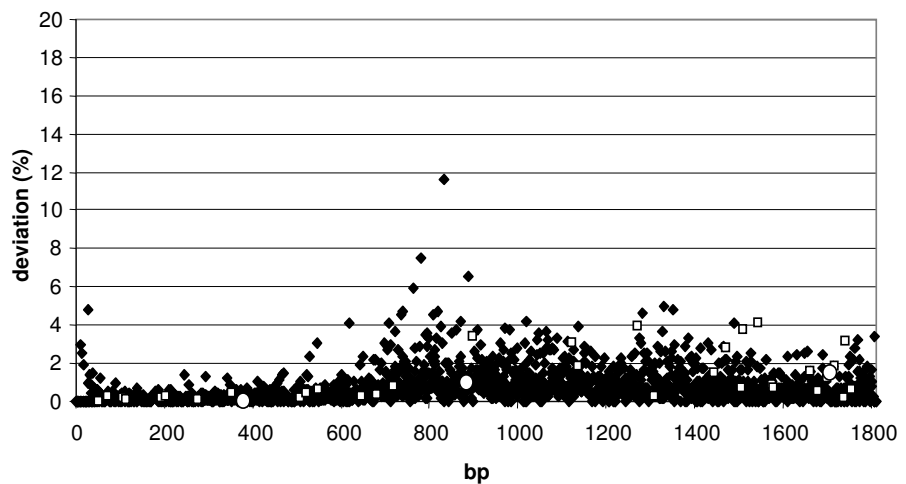

Enolase 1, (alpha)

**FTH1, number of cancerous ESTs**

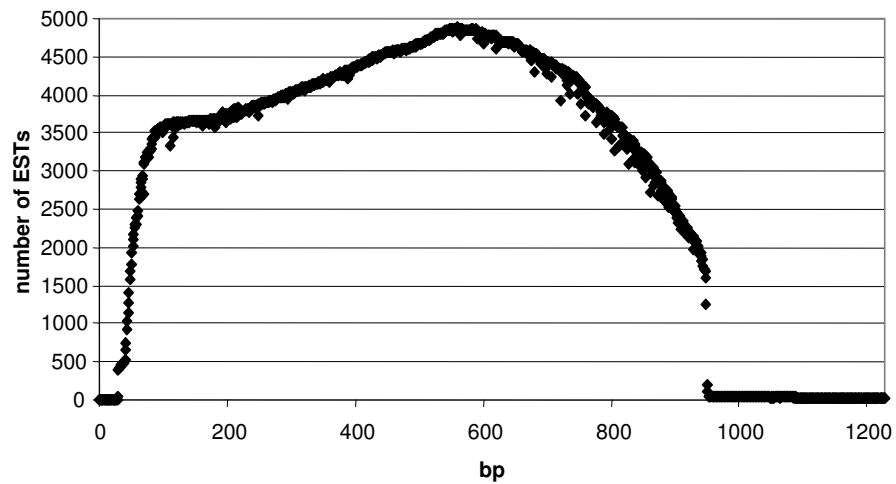

**FTH1, number of normal ESTs**

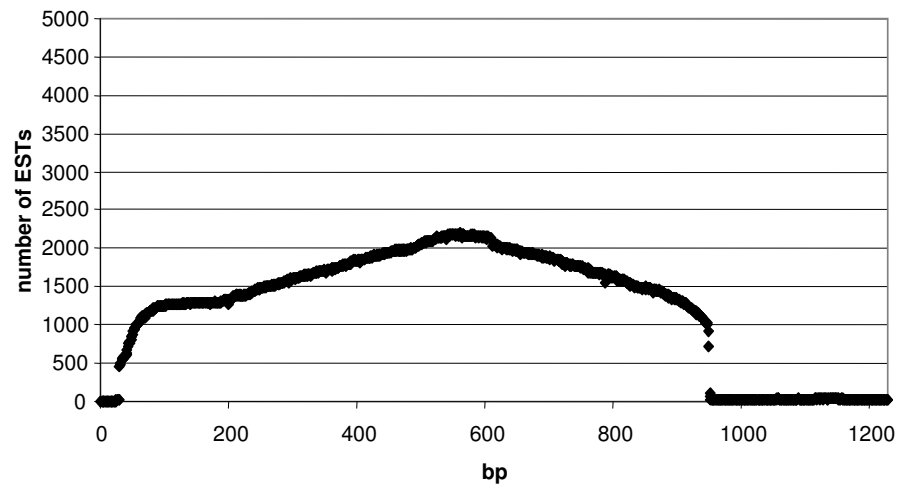

**FTH1, deviation related to RefSeq, cancerous ESTs**

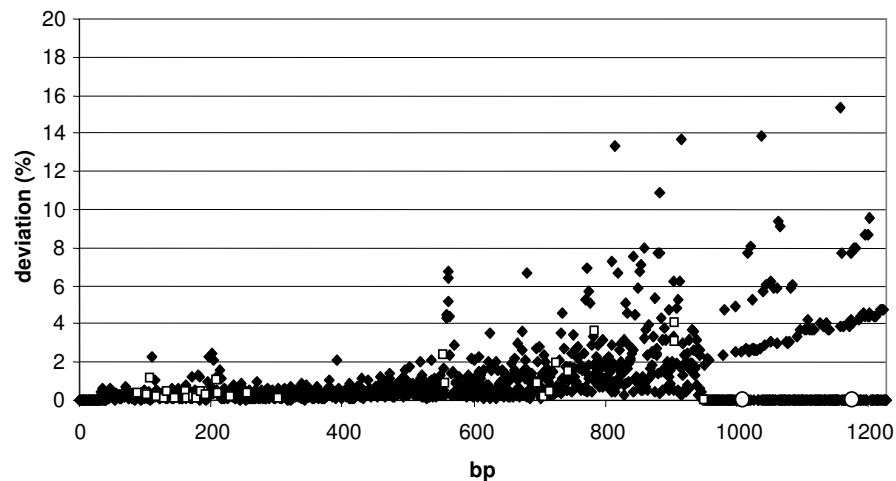

**FTH1, deviation related to RefSeq, normal ESTs**

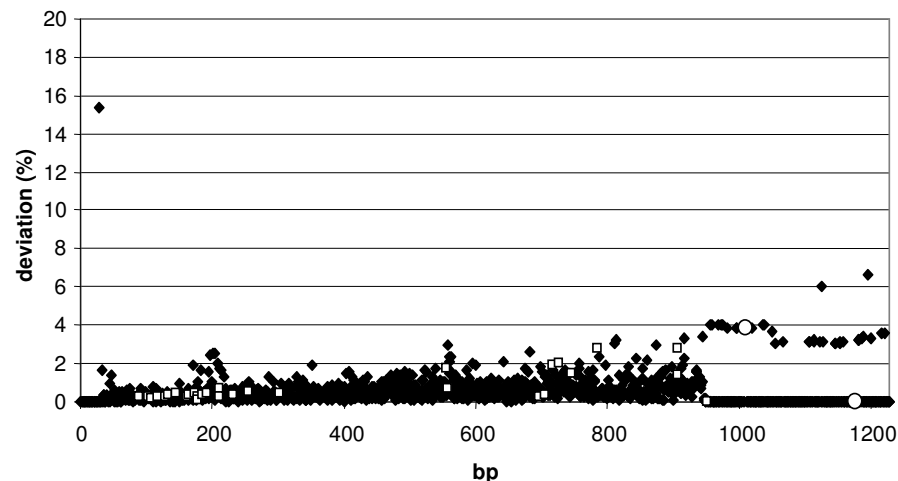

Ferritin, heavy polypeptide 1

**FTL, number of cancerous ESTs**

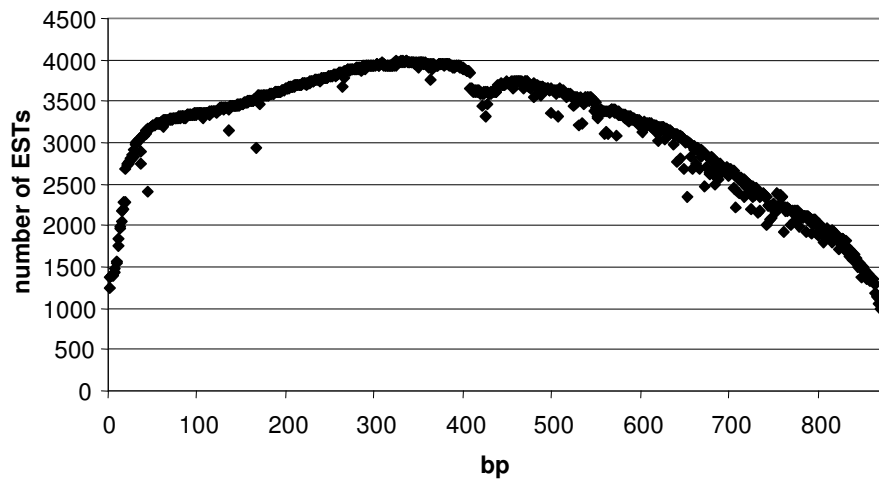

**FTL, number of normal ESTs**

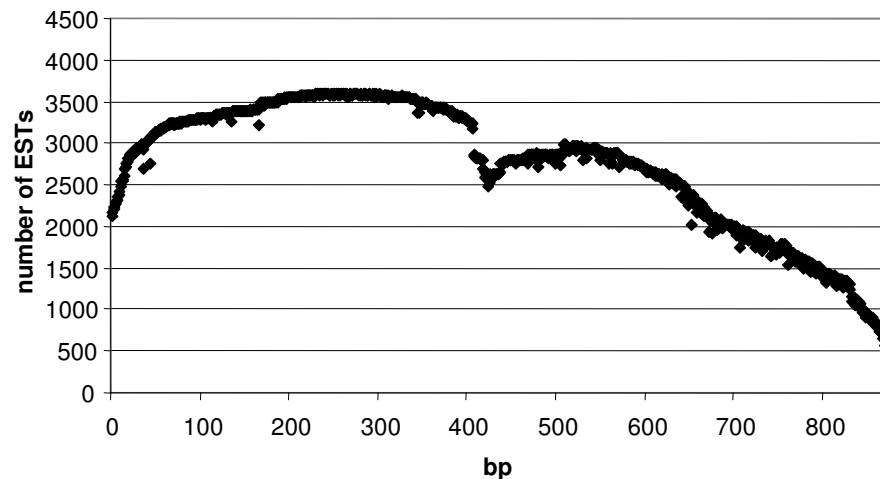

**FTL, deviation related to RefSeq, cancerous ESTs**

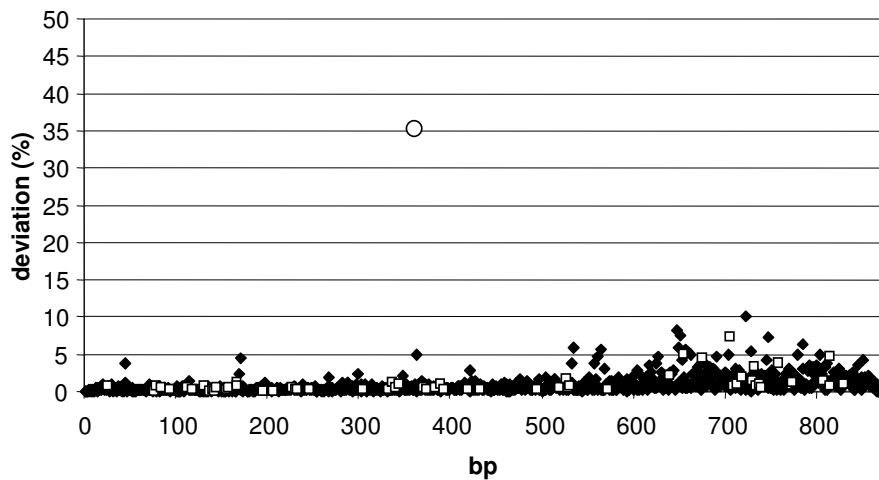

**FTL, deviation related to RefSeq, normal ESTs**

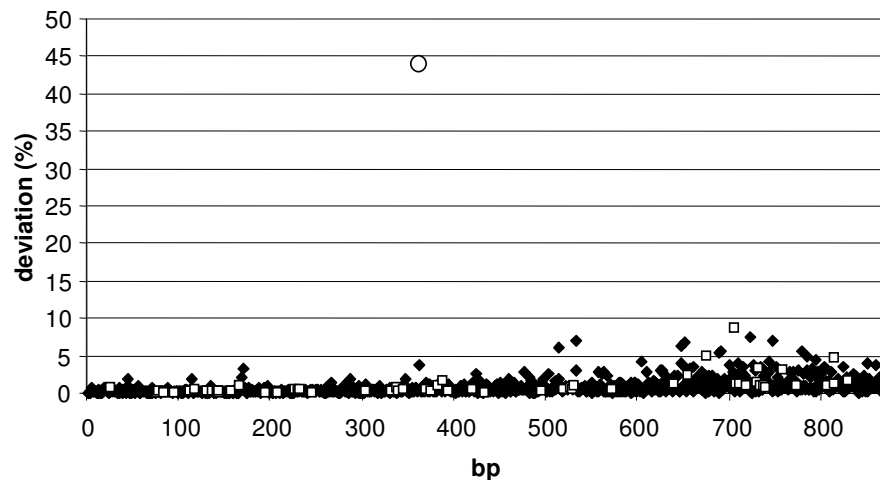

Ferritin, light polypeptide

**GAPDH, number of cancerous ESTs**

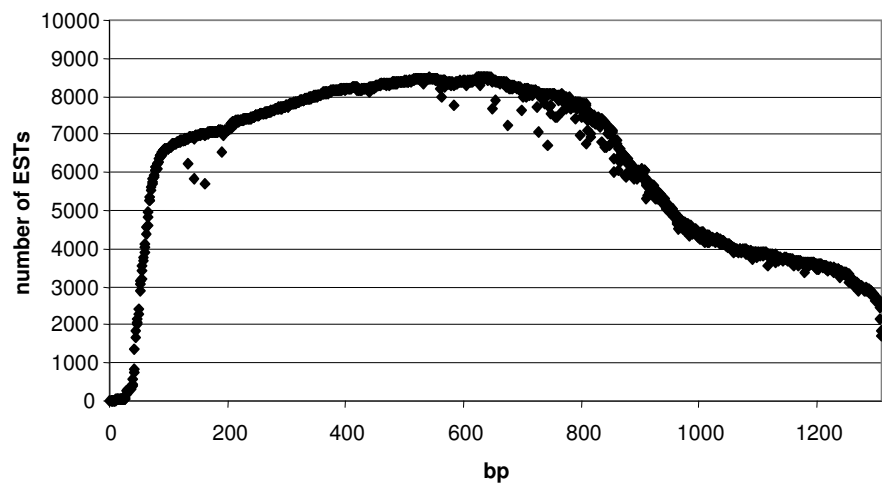

**GAPDH, number of normal ESTs**

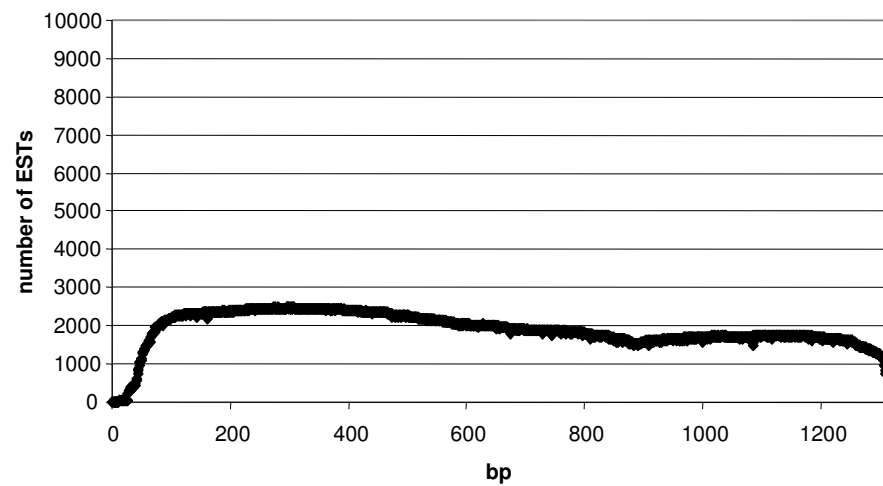

**GAPDH, deviation related to RefSeq, cancerous ESTs**

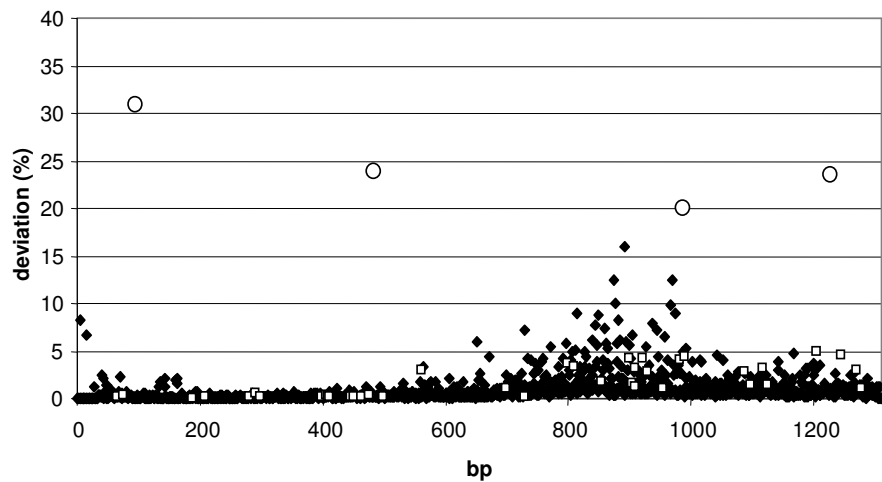

**GAPDH, deviation related to RefSeq, normal ESTs**

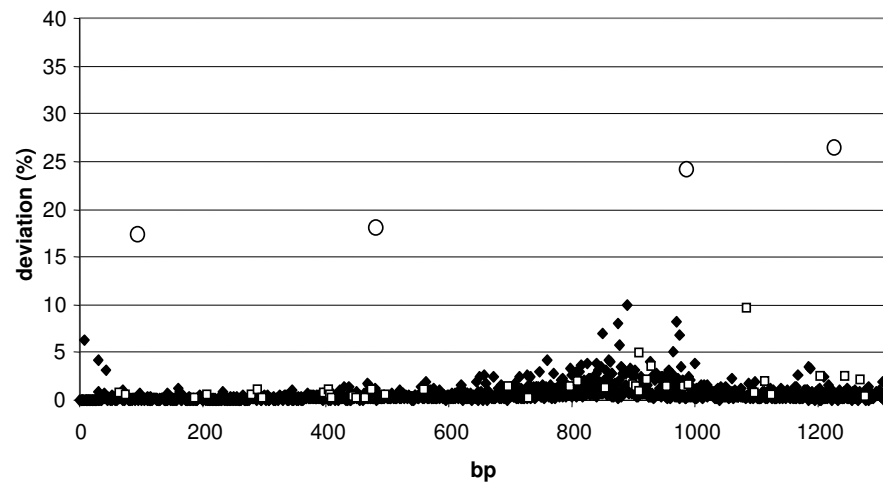

Glyceraldehyde-3-phosphate dehydrogenase



HSPA8, number of cancerous ESTs

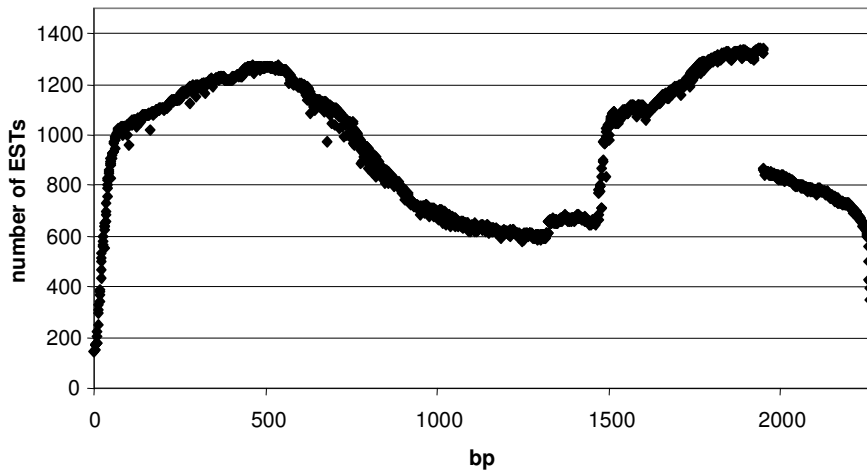

HSPA8, number of normal ESTs

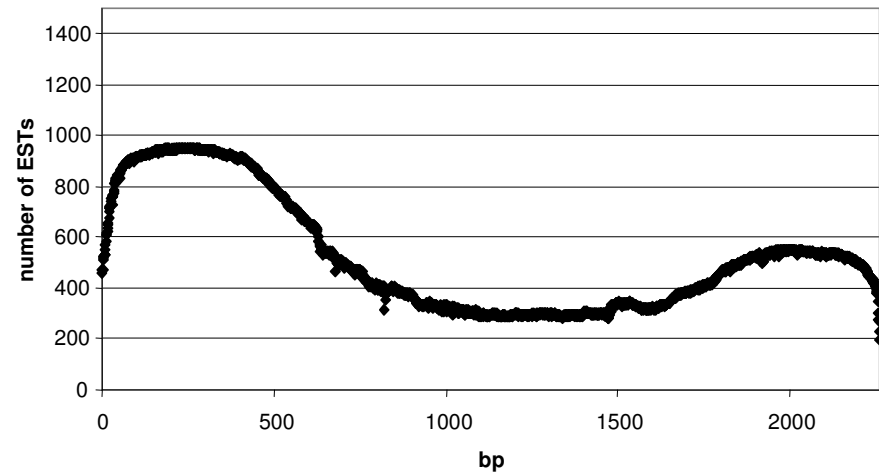

HSPA8, deviation related to RefSeq, cancerous ESTs

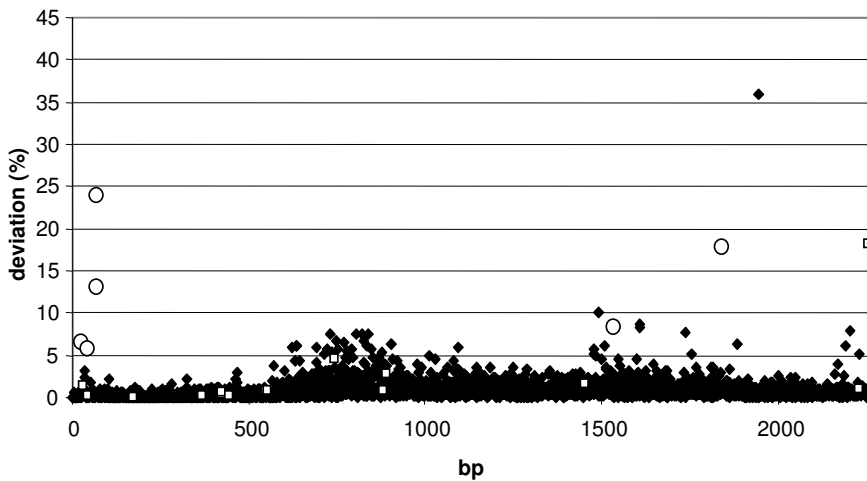

HSPA8, deviation related to RefSeq, normal ESTs

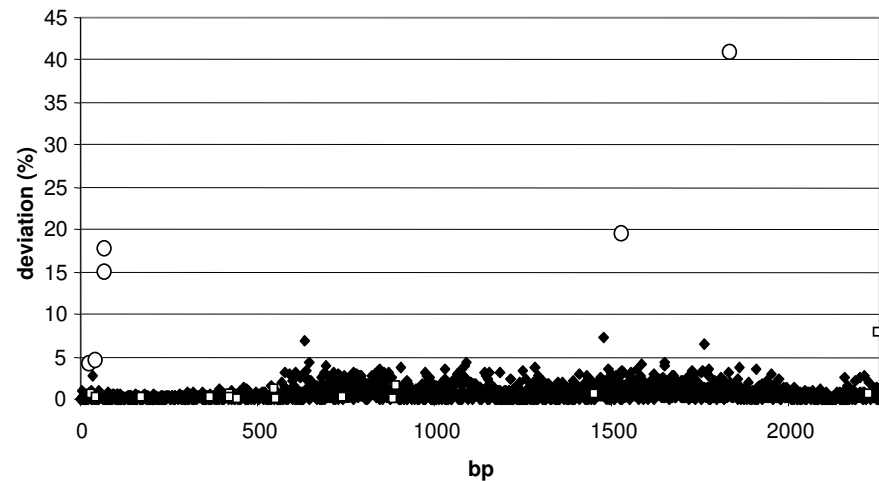

Heat shock 70kDa protein 8

**LDHA, number of cancerous ESTs**

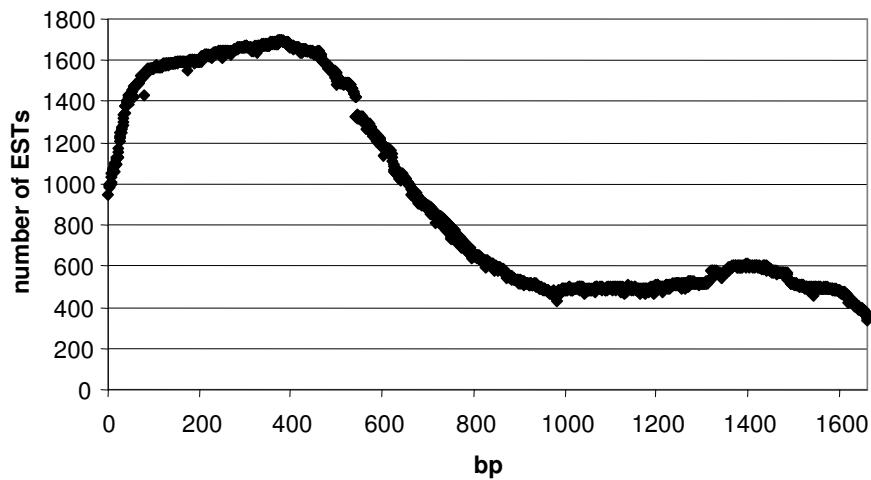

**LDHA, number of normal ESTs**

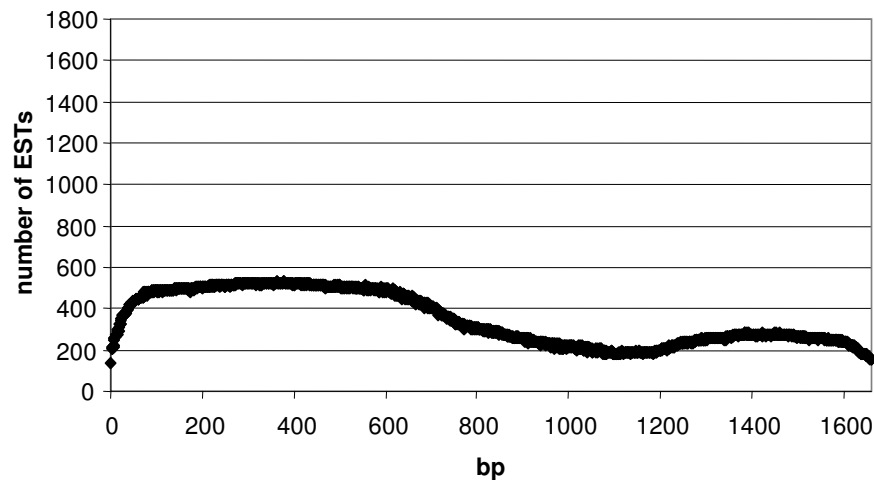

**LDHA, deviation related to RefSeq, cancerous ESTs**

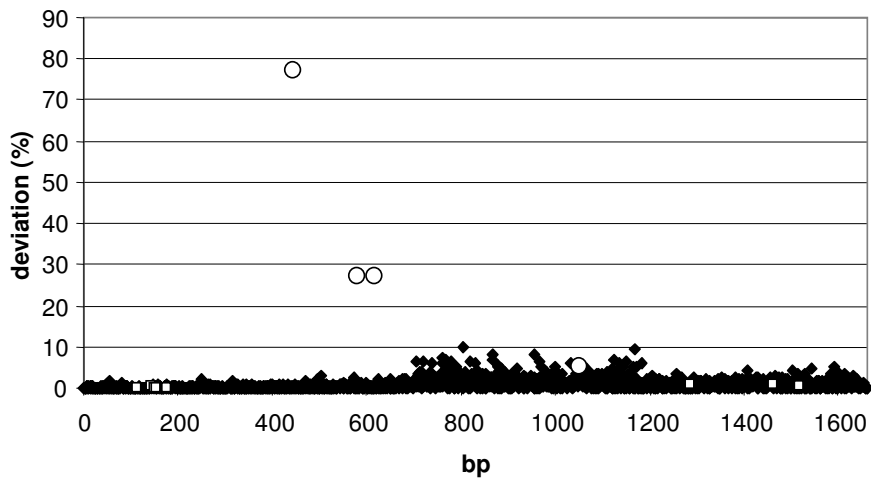

**LDHA, deviation related to RefSeq, normal ESTs**

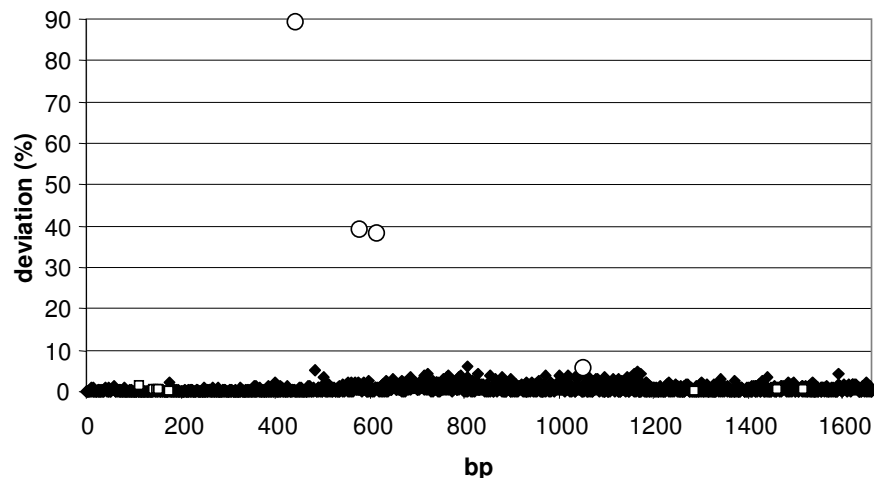

Lactate dehydrogenase A

RPL7A, number of cancerous ESTs

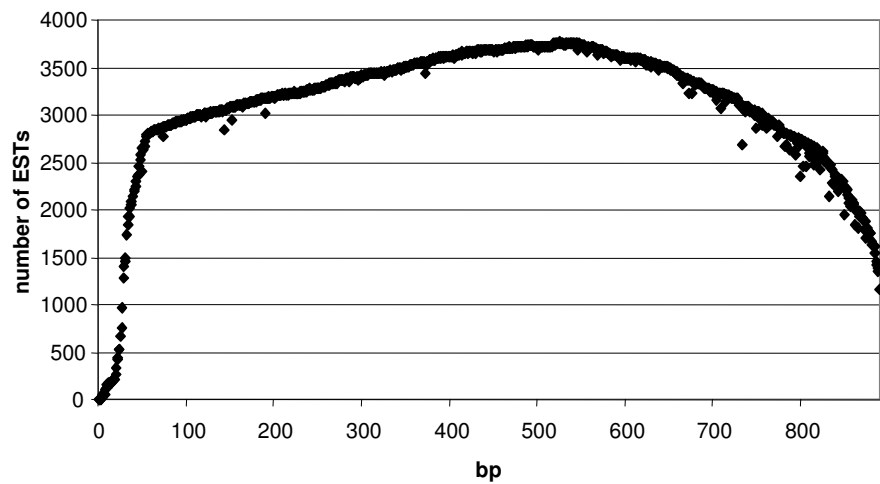

RPL7A, number of normal ESTs

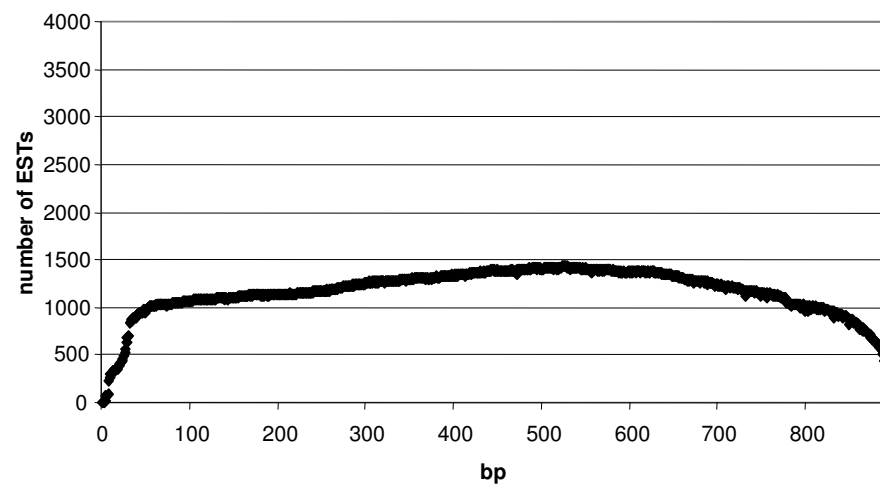

RPL7A, deviation related to RefSeq, cancerous ESTs

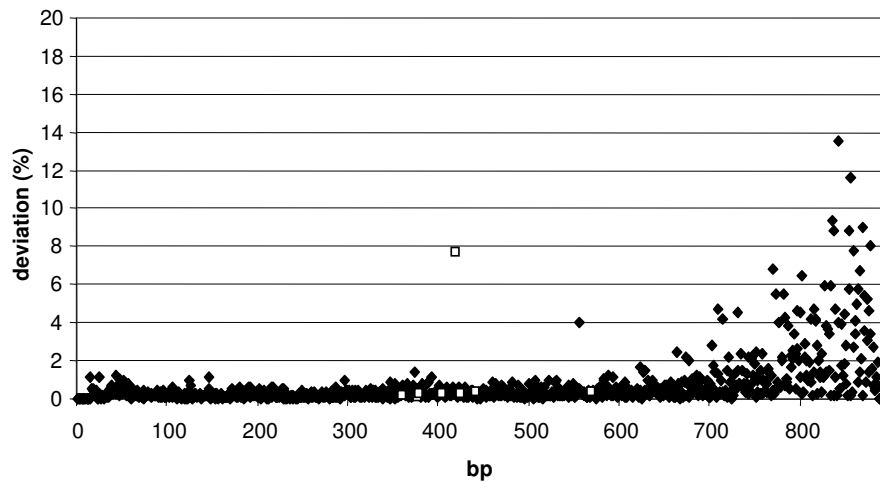

RPL7A, deviation related to RefSeq, normal ESTs

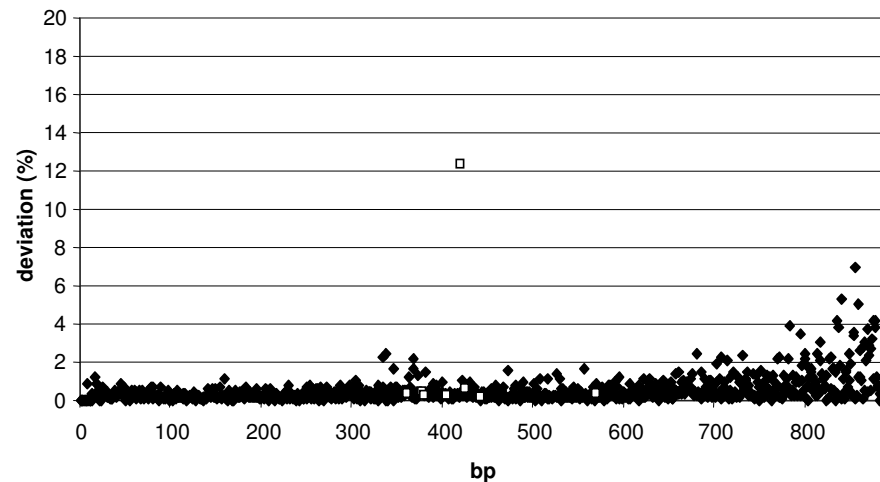

**RPS4X, number of cancerous ESTs**

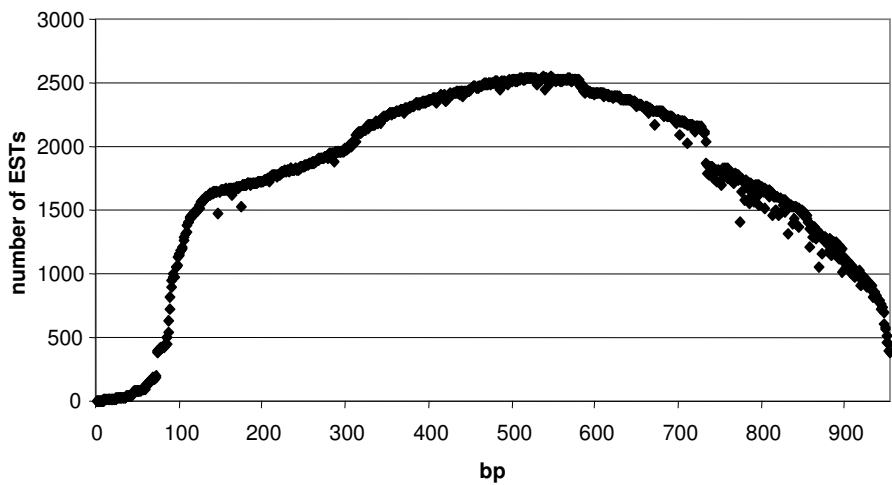

**RPS4X, number of normal ESTs**

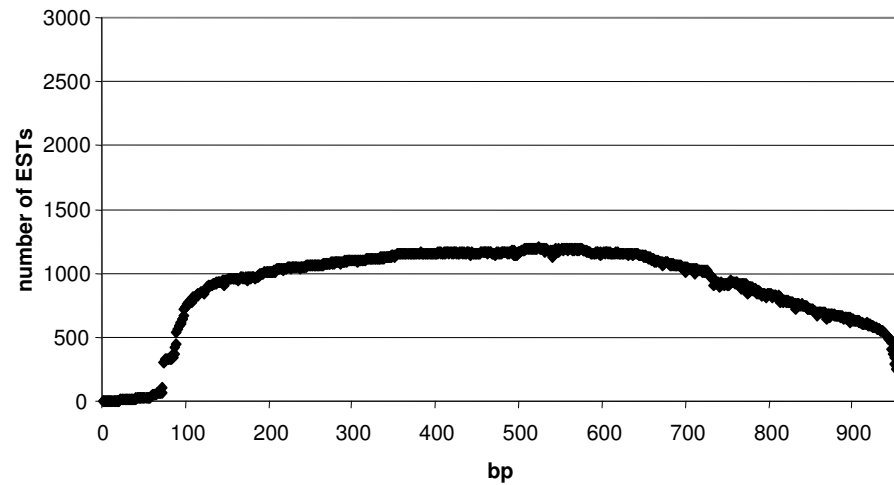

**RPS4X, deviation related to RefSeq, cancerous ESTs**

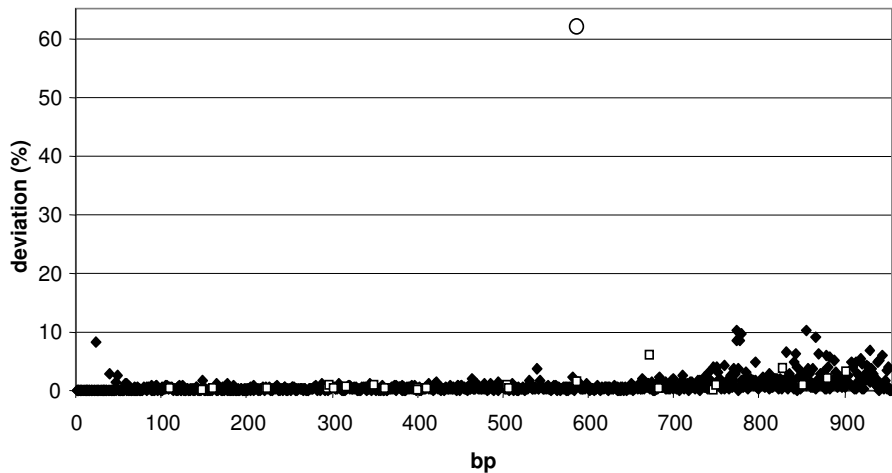

**RPS4X, deviation related to RefSeq, normal ESTs**

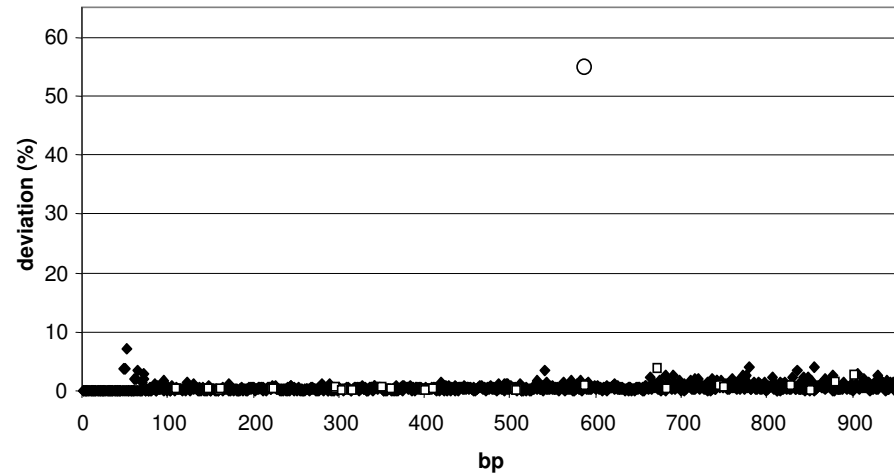

Ribosomal protein S4, X-linked

**RPS6, number of cancerous ESTs**

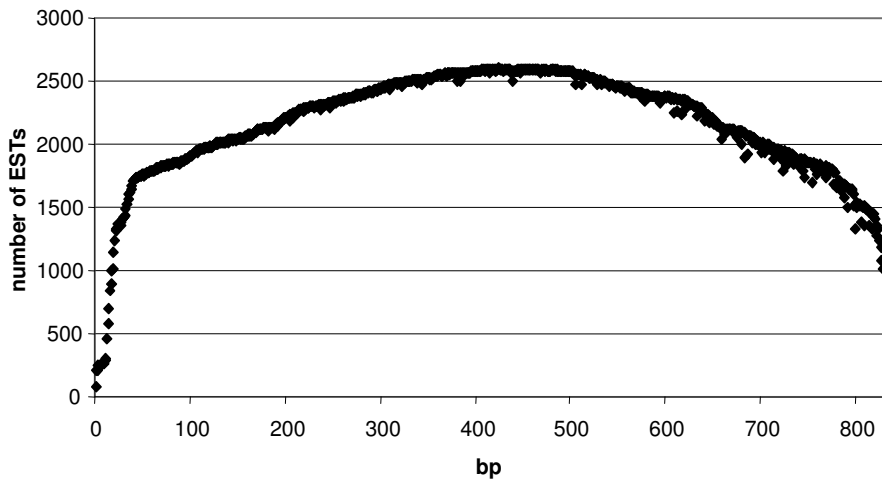

**RPS6, number of normal ESTs**

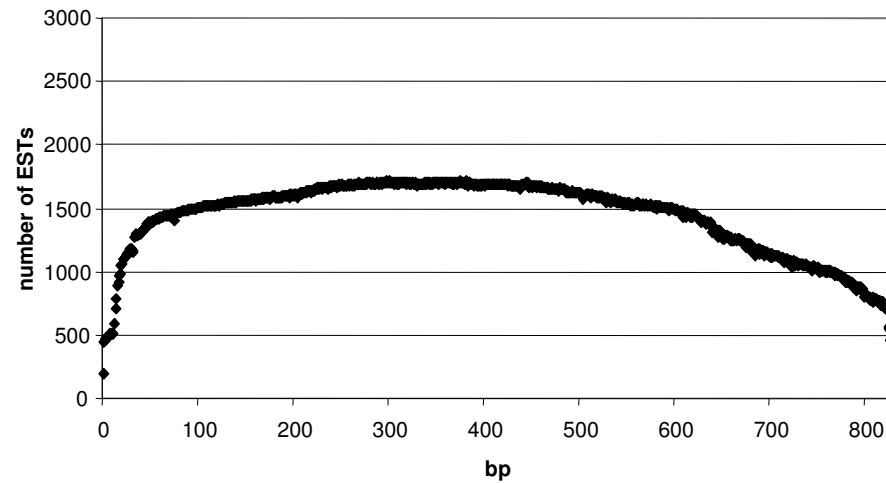

**RPS6, deviation related to RefSeq, cancerous ESTs**

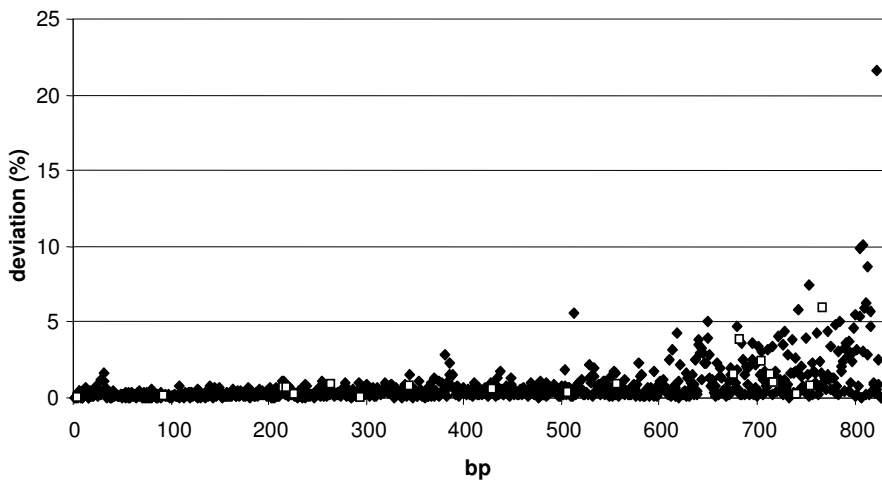

**RPS6, deviation related to RefSeq, normal ESTs**

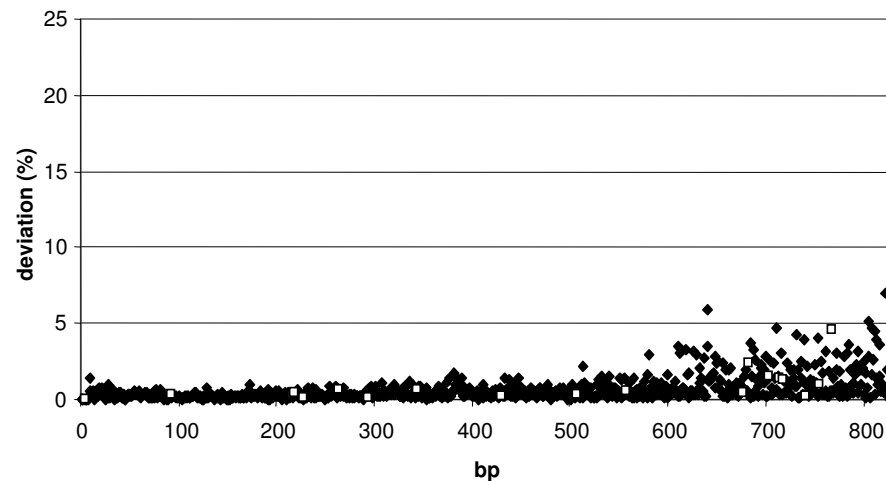

TMSB4X, number of cancerous ESTs

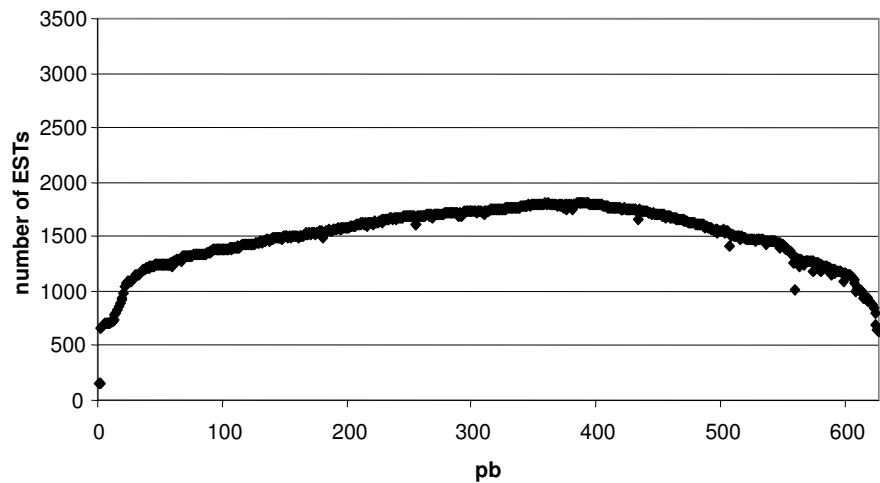

TMSB4X, number of normal ESTs

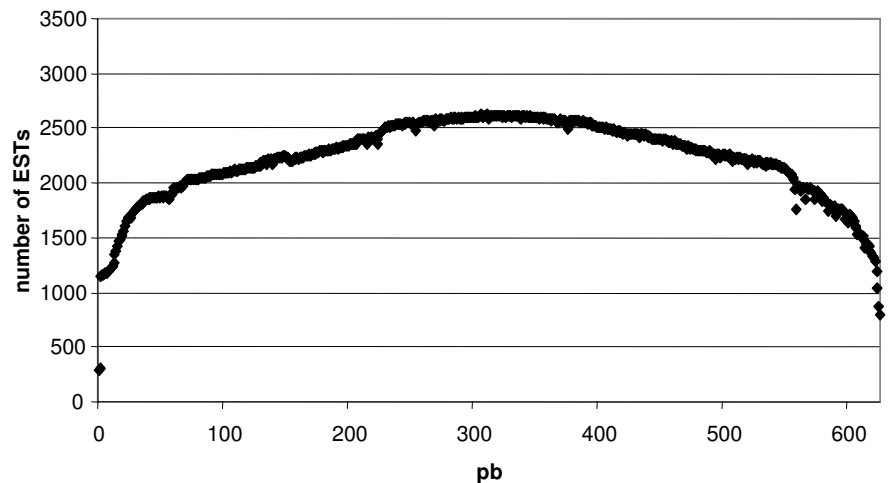

TMSB4X, deviation related to RefSeq, cancerous ESTs

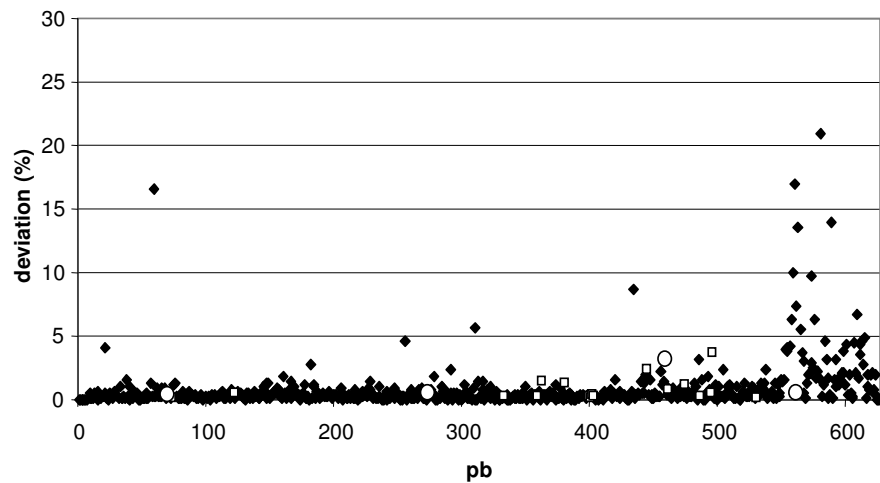

TMSB4X, deviation related to RefSeq, normal ESTs

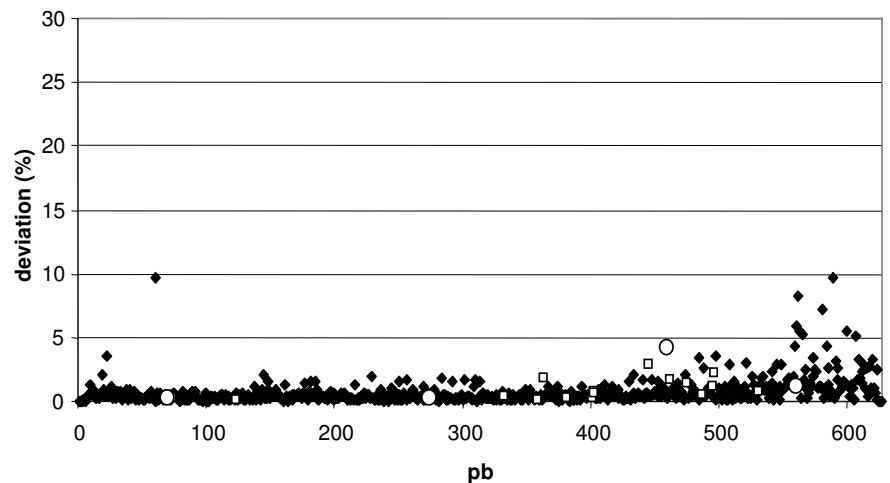

Thymosin, beta 4, X-linked

TPI1, number of cancerous ESTs

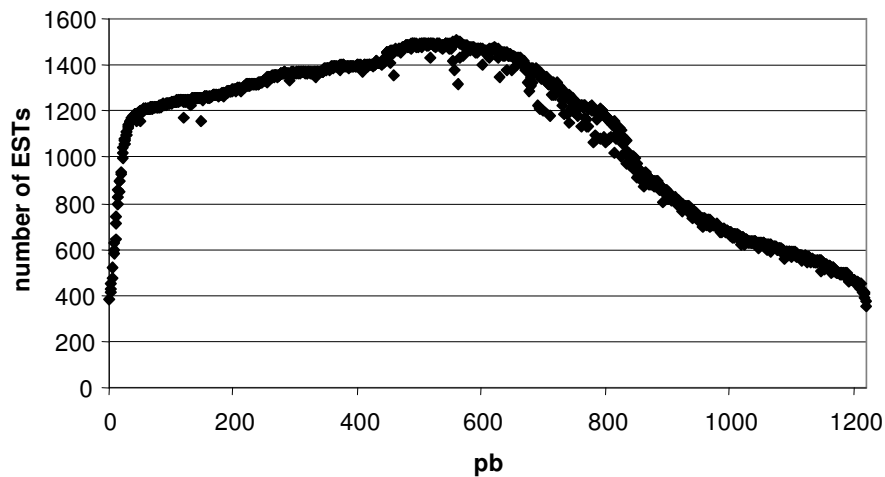

TPI1, number of normal ESTs

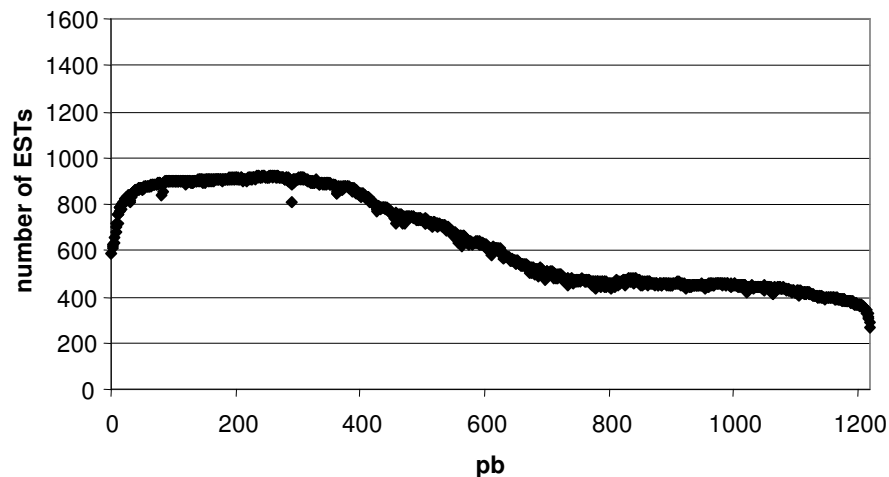

TPI1, deviation related to RefSeq, cancerous ESTs

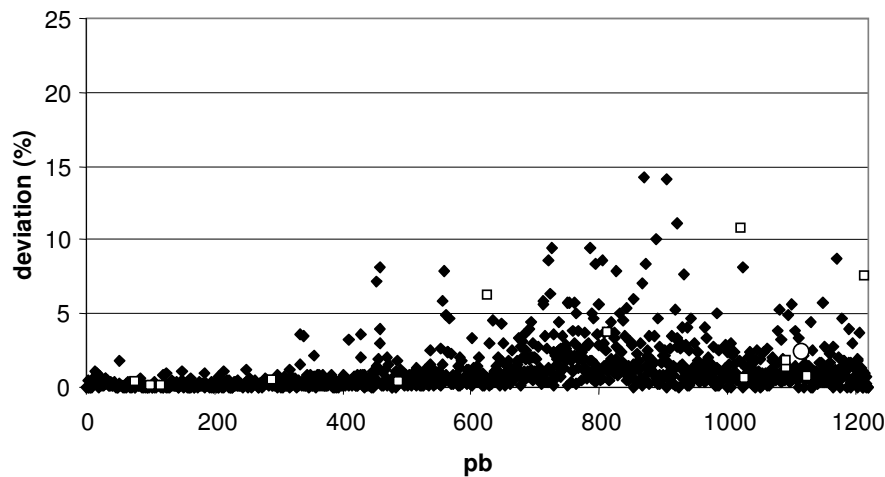

TPI1, deviation related to RefSeq, normal ESTs

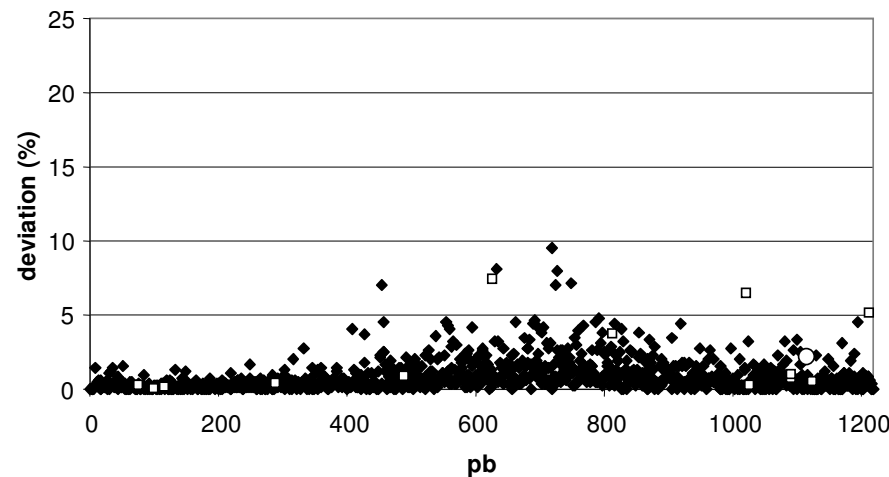

Triosephosphate isomerase 1

TPT1, number of cancerous ESTs

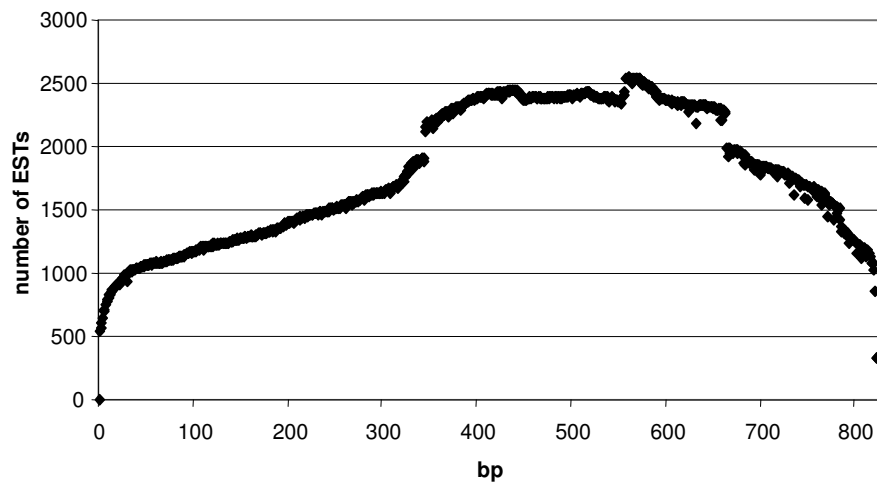

TPT1, number of normal ESTs

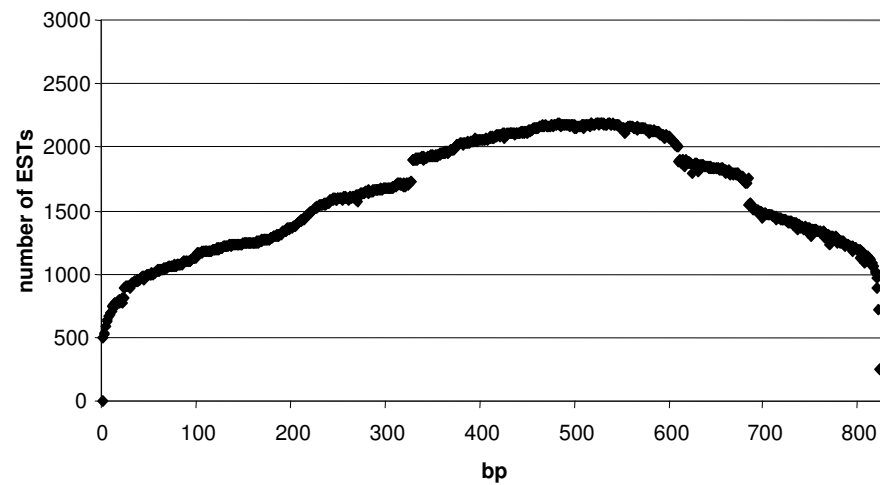

TPT1, deviation related to RefSeq, cancerous ESTs

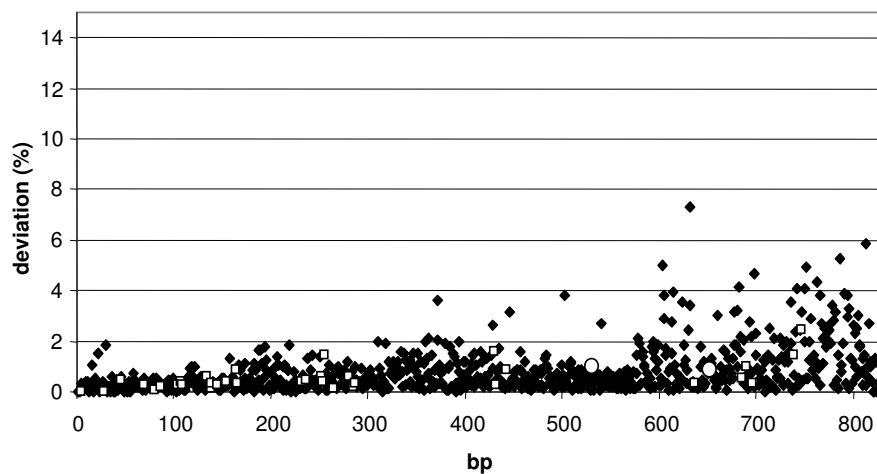

TPT1, deviation related to RefSeq, normal ESTs

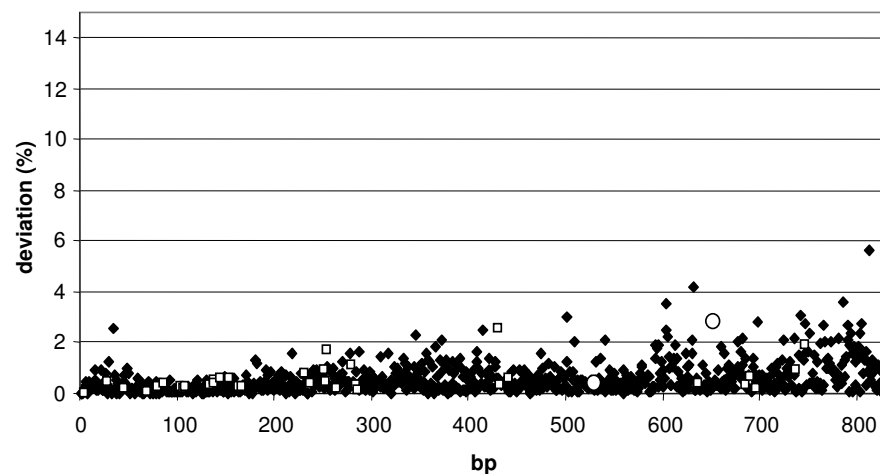

Tumor protein, translationally-controlled 1
