# Supplementary material
Source: PubMed Central journal article supplement (PMC1863453)
Supplement: pnas_0611076104_4.pdf [file pnas_0611076104_4.pdf]

|                                                 | $C > N$     | LBE        | $N > C$    | LBE        | $(C > N)/(N > C)$ | $[(C > N) - \text{LBE}]/[(N > C) - \text{LBE}]$ |
|-------------------------------------------------|-------------|------------|------------|------------|-------------------|-------------------------------------------------|
| <b>1. EST alignment <math>\geq</math> 50 bp</b> | <b>1986</b> | <b>184</b> | <b>469</b> | <b>406</b> | <b>4.23</b>       | <b>15.40</b>                                    |
| <b>2. <math>\geq</math> 70% EST aligned</b>     | <b>1797</b> | <b>167</b> | <b>481</b> | <b>358</b> | <b>3.74</b>       | <b>10.32</b>                                    |
| <b>3. Removal of paralogues and pseudogenes</b> | <b>1797</b> | <b>160</b> | <b>454</b> | <b>357</b> | <b>3.96</b>       | <b>12.22</b>                                    |
| <b>4. 50bp deleted at each extremity</b>        | <b>1126</b> | <b>90</b>  | <b>234</b> | <b>219</b> | <b>4.81</b>       | <b>19.19</b>                                    |
