# Supplementary material
Source: PubMed Central journal article supplement (PMC1863453)
Supplement: pnas_0611076104_5.pdf [file pnas_0611076104_5.pdf]

**A. All deviations (n = 2281)**

|          |   | replacement |     |     |     | %  |
|----------|---|-------------|-----|-----|-----|----|
|          |   | A           | T   | C   | G   |    |
| affected | A |             | 85  | 560 | 107 | 33 |
|          | T | 139         |     | 210 | 384 | 32 |
|          | C | 169         | 130 |     | 185 | 21 |
|          | G | 199         | 28  | 85  |     | 14 |
|          |   | %           | 22  | 11  | 37  | 30 |

**B. Deviations towards b-1 (n = 799)**

|          |   | replacement |    |     |     | %  |
|----------|---|-------------|----|-----|-----|----|
|          |   | A           | T  | C   | G   |    |
| affected | A |             | 41 | 201 | 42  | 36 |
|          | T | 28          |    | 56  | 83  | 21 |
|          | C | 77          | 41 |     | 126 | 30 |
|          | G | 75          | 9  | 20  |     | 13 |
|          |   | %           | 23 | 11  | 35  | 31 |

**C. Deviations towards b+1 (n = 530)**

|          |   | replacement |    |    |     | %  |
|----------|---|-------------|----|----|-----|----|
|          |   | A           | T  | C  | G   |    |
| affected | A |             | 24 | 52 | 37  | 21 |
|          | T | 27          |    | 45 | 177 | 47 |
|          | C | 38          | 48 |    | 15  | 19 |
|          | G | 40          | 11 | 16 |     | 13 |
|          |   | %           | 20 | 16 | 21  | 43 |

**D. Deviations towards neither b-1 nor b+1 (n = 347)**

|          |   | replacement |    |     |    | %  |
|----------|---|-------------|----|-----|----|----|
|          |   | A           | T  | C   | G  |    |
| affected | A |             | 7  | 148 | 8  | 47 |
|          | T | 42          |    | 50  | 9  | 29 |
|          | C | 17          | 10 |     | 23 | 14 |
|          | G | 7           | 2  | 24  |    | 10 |
|          |   | %           | 19 | 5   | 64 | 12 |

**E. Deviations towards b-1 = b+1 (n = 339)**

|          |   | replacement |    |    |    | %  |
|----------|---|-------------|----|----|----|----|
|          |   | A           | T  | C  | G  |    |
| affected | A |             | 5  | 52 | 12 | 20 |
|          | T | 11          |    | 12 | 95 | 35 |
|          | C | 25          | 30 |    | 17 | 21 |
|          | G | 71          | 1  | 8  |    | 24 |
|          |   | %           | 31 | 11 | 21 | 37 |

**F. Deviations within Triplet (n = 266)**

|          |   | replacement |    |     |    | %  |
|----------|---|-------------|----|-----|----|----|
|          |   | A           | T  | C   | G  |    |
| affected | A |             | 8  | 107 | 8  | 46 |
|          | T | 31          |    | 47  | 20 | 37 |
|          | C | 12          | 1  |     | 4  | 6  |
|          | G | 6           | 5  | 17  |    | 11 |
|          |   | %           | 19 | 5   | 64 | 12 |
