# Supplementary material
Source: PubMed Central journal article supplement (PMC1863453)

A

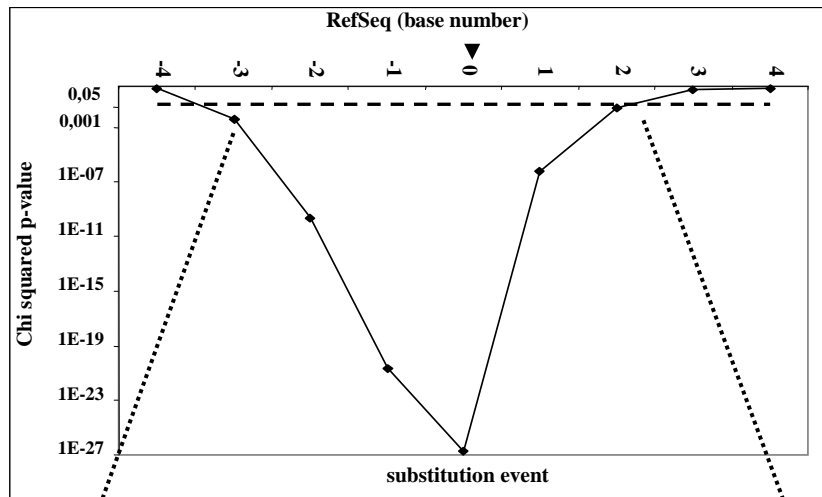

|   | b-3 |    | b-2 |    | b-1 |    | b0 |    | b+1 |    | b+2 |    |
|---|-----|----|-----|----|-----|----|----|----|-----|----|-----|----|
|   | H   | NH | H   | NH | H   | NH | H  | NH | H   | NH | H   | NH |
| A | 24  | 27 | 24  | 27 | 23  | 22 | 35 | 23 | 31  | 25 | 28  | 26 |
| T | 26  | 23 | 31  | 23 | 11  | 27 | 21 | 22 | 25  | 24 | 27  | 26 |
| C | 28  | 24 | 17  | 26 | 35  | 26 | 31 | 26 | 26  | 25 | 20  | 24 |
| G | 22  | 26 | 28  | 24 | 31  | 25 | 13 | 29 | 18  | 26 | 25  | 24 |

B

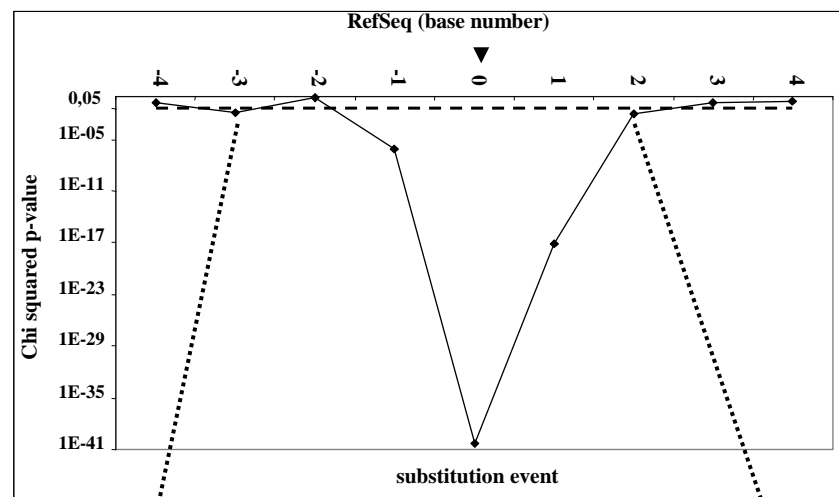

|   | b-3 |    | b-1 |    | b0 |    | b+1 |    | b+2 |    |
|---|-----|----|-----|----|----|----|-----|----|-----|----|
|   | H   | NH | H   | NH | H  | NH | H   | NH | H   | NH |
| A | 25  | 27 | 21  | 22 | 21 | 23 | 20  | 25 | 26  | 26 |
| T | 27  | 23 | 36  | 27 | 47 | 22 | 16  | 24 | 21  | 26 |
| C | 26  | 24 | 25  | 26 | 19 | 26 | 21  | 25 | 22  | 24 |
| G | 22  | 26 | 18  | 25 | 13 | 29 | 43  | 26 | 31  | 24 |

Supplement: pnas_0611076104_6.pdf [file pnas_0611076104_6.pdf]
